# Supplementary material for: Comparison of three aerosol chemical characterization techniques utilizing PTR-ToF-MS: A study on freshly formed and aged biogenic SOA
Source: Copernicus journal article supplement (doi:10.5194/amt-2017-288), 2017-09-06
Supplement: Supplementary file 1 [file amt-2017-288-supplement.pdf]

Supplementary material for the publication:

Comparison of three aerosol chemical characterization techniques utilizing PTR-ToF-MS: A study on freshly formed and aged biogenic SOA

Table S 1: Major detected ion signals and their possible compound attribution that overlap with compound identifications from previous publications. These compounds correspond to the orange circle markers shown in Figure 7. The detected ion column indicates whether the PTR based techniques were able to detect the parent ion  $[M+H]^+$  or the parent ion after water loss  $[M+H-H_2O]^+$  due to fragmentation including the detected exact protonated  $m/z$ .

|                                                                                             | Chemical formula | MW     | Structure                                                                           | SMILES code                                                                      | Detected ion               |
|---------------------------------------------------------------------------------------------|------------------|--------|-------------------------------------------------------------------------------------|----------------------------------------------------------------------------------|----------------------------|
| <b><math>\beta</math>-pinene</b>                                                            |                  |        |                                                                                     |                                                                                  |                            |
| <small>(Chen and Griffin, 2005; Hohaus et al., 2015; Jenkin, 2004; Yu et al., 1999)</small> |                  |        |                                                                                     |                                                                                  |                            |
| Nopinone                                                                                    | $C_9H_{14}O$     | 138.21 | 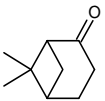   | <chem>CC1(C2CC1C(=O)CC2)C</chem>                                                 | $[M+H]^+$<br>(139.11)      |
| 2,2-Dimethyl-cyclobutane-1,3-dicarboxaldehyde                                               | $C_8H_{12}O_2$   | 140.18 |  | <chem>O=CC1CC(C=O)C1(C)C</chem>                                                  | $[M+H]^+$<br>(141.09)      |
| Oxonopinone                                                                                 | $C_9H_{12}O_2$   | 152.19 |  | <chem>CC1(C2CC1C(=O)C(=O)C2)C</chem>                                             | $[M+H]^+$<br>(153.09)      |
| 2,2-Dimethyl-3-formyl-cyclobutyl-methanoic acid                                             | $C_8H_{12}O_3$   | 156.18 |  | <chem>OC(=O)C1CC(C=O)C1(C)C</chem>                                               | $[M+H-H_2O]^+$<br>(139.07) |
|                                                                                             |                  |        |  | <chem>OC(=O)C1CC(C(C)=O)C1(C)C</chem>                                            |                            |
| Norpinonic acid top/<br>Pinalic-3-acid middle/<br>Pinalic-4-acid bottom                     | $C_9H_{14}O_3$   | 170.21 |  | <chem>OC(=O)C1CC(CC=O)C1(C)C</chem>                                              | $[M+H-H_2O]^+$<br>(153.09) |
|                                                                                             |                  |        |  | <chem>OC(=O)CC1CC(C=O)C1(C)C</chem>                                              |                            |
| Norpinic acid                                                                               | $C_8H_{12}O_4$   | 172.18 |  | <chem>CC1(C(C1C(=O)O)C(=O)O)C</chem>                                             | $[M+H-H_2O]^+$<br>(155.07) |
| Hydroxy norpinonic acids                                                                    | $C_9H_{14}O_4$   | 186.21 |  | <chem>OC(=O)C1CC(C(=O)CO)C1(C)C</chem><br><chem>OC(C=O)C1CC(C(=O)O)C1(C)C</chem> | $[M+H-H_2O]^+$<br>(169.09) |

|                                                                                                                      |                                                |        |                                                                                     |                           |                                                      |
|----------------------------------------------------------------------------------------------------------------------|------------------------------------------------|--------|-------------------------------------------------------------------------------------|---------------------------|------------------------------------------------------|
|                                                                                                                      |                                                |        | 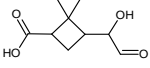   |                           |                                                      |
| Pinic acid                                                                                                           | C <sub>9</sub> H <sub>14</sub> O <sub>4</sub>  | 186.21 |    | CC1(C(CC1C(=O)O)CC(=O)O)C | [M+H- H <sub>2</sub> O] <sup>+</sup><br>(169.09)     |
| <b>Limonene</b>                                                                                                      |                                                |        |                                                                                     |                           |                                                      |
| (Chen and Griffin, 2005; Jaoui et al., 2006; Kundu et al., 2012; Leungsakul et al., 2005a; Leungsakul et al., 2005b) |                                                |        |                                                                                     |                           |                                                      |
| 3-Oxobutanal                                                                                                         | C <sub>4</sub> H <sub>6</sub> O <sub>2</sub>   | 86.09  |    | CC(=O)CC=O                | [M+H] <sup>+</sup><br>protonated molecule<br>(87.04) |
| Levulinic acid                                                                                                       | C <sub>5</sub> H <sub>8</sub> O <sub>3</sub>   | 116.12 |    | CC(=O)CCC(=O)O            | [M+H- H <sub>2</sub> O] <sup>+</sup><br>(99.04)      |
| Pentanedioic acid                                                                                                    | C <sub>5</sub> H <sub>8</sub> O <sub>4</sub>   | 132.11 |    | OC(=O)CCCC(=O)O           | [M+H- H <sub>2</sub> O] <sup>+</sup><br>(115.04)     |
| 3,6-Oxoheptanoic acid                                                                                                | C <sub>7</sub> H <sub>10</sub> O <sub>4</sub>  | 158.15 |    | O=C(CCC(C)=O)CC(=O)O      | [M+H- H <sub>2</sub> O] <sup>+</sup><br>(141.05)     |
| Limonic acid                                                                                                         | C <sub>9</sub> H <sub>14</sub> O <sub>3</sub>  | 170.21 |  | O=CCC(CCC(=O)O)C(=C)C     | [M+H- H <sub>2</sub> O] <sup>+</sup><br>(153.09)     |
| Norlimononic acid                                                                                                    | C <sub>9</sub> H <sub>14</sub> O <sub>3</sub>  | 170.21 |  | O=C(C)CCC(C(=C)C)C(=O)O   | [M+H- H <sub>2</sub> O] <sup>+</sup><br>(153.09)     |
| Ketolimononaldehyde                                                                                                  | C <sub>9</sub> H <sub>14</sub> O <sub>3</sub>  | 170.21 |  | CC(=O)C(CC(=O)CCC(=O)O)C  | [M+H- H <sub>2</sub> O] <sup>+</sup><br>(153.09)     |
| Norlimonic acid                                                                                                      | C <sub>8</sub> H <sub>12</sub> O <sub>4</sub>  | 172.18 |  | OC(=O)CCC(C(=C)C)C(=O)O   | [M+H- H <sub>2</sub> O] <sup>+</sup><br>(155.07)     |
| Limonic acid                                                                                                         | C <sub>10</sub> H <sub>16</sub> O <sub>3</sub> | 184.23 |  | O=C(C)CCC(CC(=O)O)C(=C)C  | [M+H- H <sub>2</sub> O] <sup>+</sup><br>(167.11)     |
| 4-Isopropenyl-1-methyl-1,5-hydroxy-2-oxocyclohexane                                                                  | C <sub>10</sub> H <sub>16</sub> O <sub>3</sub> | 184.23 |  | CC(=C)C1CC(=O)C(C)(O)CC1O | [M+H- H <sub>2</sub> O] <sup>+</sup><br>(167.11)     |
| 7-Hydroxylimononaldehyde                                                                                             | C <sub>10</sub> H <sub>16</sub> O <sub>3</sub> | 184.23 |  | O=C(CCC(CC(=O)O)C(=C)C)CO | [M+H- H <sub>2</sub> O] <sup>+</sup><br>(167.11)     |
| Ketolimononic acid                                                                                                   | C <sub>9</sub> H <sub>14</sub> O <sub>4</sub>  | 186.21 |  | O=C(C)CCC(CC(=O)O)C(=O)O  | [M+H- H <sub>2</sub> O] <sup>+</sup>                 |

|                         |                                                |        |                                                                                   |                             |                                                  |
|-------------------------|------------------------------------------------|--------|-----------------------------------------------------------------------------------|-----------------------------|--------------------------------------------------|
|                         |                                                |        |                                                                                   |                             | (169.09)                                         |
| Limonic acid            | C <sub>9</sub> H <sub>14</sub> O <sub>4</sub>  | 186.21 | 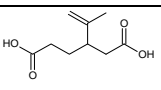 | OC(=O)CCC(CC(=O)O)C(=C)C    | [M+H- H <sub>2</sub> O] <sup>+</sup><br>(169.09) |
| Ketolimonic acid        | C <sub>8</sub> H <sub>12</sub> O <sub>5</sub>  | 188.18 |  | OC(=O)CCC(CC(=O)O)C(C)=O    | [M+H- H <sub>2</sub> O] <sup>+</sup><br>(171.06) |
| 5-Hydroxylimononic acid | C <sub>10</sub> H <sub>16</sub> O <sub>4</sub> | 200.23 |  | O=C(C)C(O)CC(CC(O)=O)C(=C)C | [M+H- H <sub>2</sub> O] <sup>+</sup><br>(183.10) |
| 7-Hydroxylimononic acid | C <sub>10</sub> H <sub>16</sub> O <sub>4</sub> | 200.23 |  | O=C(CCC(CC(=O)O)C(=C)C)CO   | [M+H- H <sub>2</sub> O] <sup>+</sup><br>(183.10) |

## Trees

( $\alpha$ -pinene /  $\Delta^3$ -carene)

(Chen and Griffin, 2005; Praplan et al., 2014;  
Yu et al., 1999)

|                                                                                         |                                                |        |                                                                                     |                           |                                                  |
|-----------------------------------------------------------------------------------------|------------------------------------------------|--------|-------------------------------------------------------------------------------------|---------------------------|--------------------------------------------------|
| 2,2-Dimethyl-cyclobutyl-1,3-dicarboxaldehyde                                            | C <sub>8</sub> H <sub>12</sub> O <sub>2</sub>  | 140.18 | 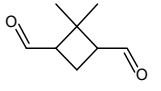  | O=CC1CC(C=O)C1(C)C        | [M+H] <sup>+</sup><br>(141.09)                   |
| 2,2-Dimethyl-3-formyl-cyclobutyl-methanoic-acid                                         | C <sub>8</sub> H <sub>12</sub> O <sub>3</sub>  | 156.18 |  | OC(=O)C1CC(C=O)C1(C)C     | [M+H] <sup>+</sup><br>(157.09)                   |
| Norpinonic acid and isomers(upper three) / 3-Norcaronic acid and isomers (bottom three) | C <sub>9</sub> H <sub>14</sub> O <sub>3</sub>  | 170.21 |  | OC(=O)C1CC(C(C)=O)C1(C)C  | [M+H- H <sub>2</sub> O] <sup>+</sup><br>(153.09) |
|                                                                                         |                                                |        |  | OC(=O)C1CC(CC=O)C1(C)C    |                                                  |
|                                                                                         |                                                |        |  | OC(=O)CC1CC(C=O)C1(C)C    |                                                  |
|                                                                                         |                                                |        |  | O=C(C)CC1C(C(=O)O)C1(C)C  |                                                  |
|                                                                                         |                                                |        |  | OC(=O)CC1C(CC=O)C1(C)C    |                                                  |
|                                                                                         |                                                |        |  | OC(=O)CC1C(CC=O)C1(C)C    |                                                  |
| Norpinic acid / Nor-3-caric acid                                                        | C <sub>8</sub> H <sub>12</sub> O <sub>4</sub>  | 172.18 |  | CC1(C(CC1C(=O)O)C(=O)O)C  | [M+H- H <sub>2</sub> O] <sup>+</sup><br>(155.07) |
| (2,2-Dimethyl-3-acetyl)-cyclobutyl-formate                                              | C <sub>10</sub> H <sub>16</sub> O <sub>3</sub> | 184.23 |  | O=C(C)C1CC(COC=O)C1(C)C   | [M+H- H <sub>2</sub> O] <sup>+</sup><br>(167.11) |
| Pinonic acid / 3-caronic acid                                                           | C <sub>10</sub> H <sub>16</sub> O <sub>3</sub> | 184.23 |  | OC(=O)CC1CC(C(C)=O)C1(C)C | [M+H- H <sub>2</sub> O] <sup>+</sup><br>(167.11) |

|                                                                               |                   |        |                                                                                   |                                         |                            |
|-------------------------------------------------------------------------------|-------------------|--------|-----------------------------------------------------------------------------------|-----------------------------------------|----------------------------|
| Hydroxy pinonaldehydes<br>(upper two)<br>/ Hydroxy 3-caronic acid<br>(bottom) | $C_{10}H_{16}O_3$ | 184.23 | 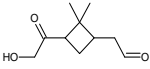 | <chem>O=C(CO)C1CC(CC=O)C1(C)C</chem>    | $[M+H-H_2O]^+$<br>(167.11) |
|                                                                               |                   |        |  | <chem>OC(C=O)C1CC(C(C)=O)C1(C)C</chem>  |                            |
|                                                                               |                   |        |  | <chem>OC(=O)CC1C(CC(=O)CO)C1(C)C</chem> |                            |
| Pinic acid / 3-Caric acid                                                     | $C_9H_{14}O_4$    | 186.21 |  | <chem>CC1(C(CC1C(=O)O)CC(=O)O)C</chem>  | $[M+H-H_2O]^+$<br>(169.09) |

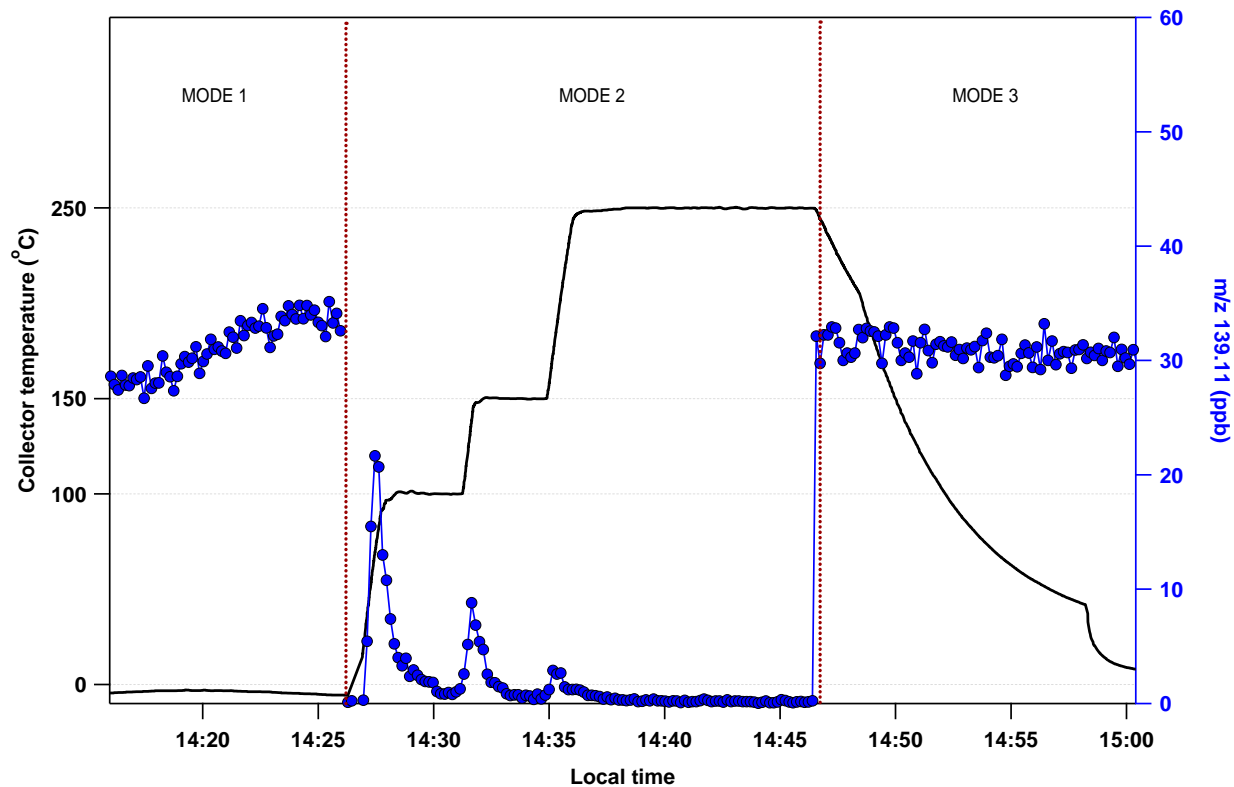

Figure S 1: Different modes of operation of the ACM-PTR-ToF-MS during the  $\beta$ -pinene ozonolysis experiment. Left axis correspond to the temperature of the collector and right axis to the ppb's measured for  $m/z$  139.11 (corresponding to nopinone) with time. MODE 1 indicates the particulate phase collection on the cooled ACM collector and the parallel gas phase measurements of the PTR-ToF-MS. MODE 2 is the desorption of particulate phase compounds from the collector at the different temperature steps and MODE 3 corresponds to gas phase measurements and the intermediate step of cooling down the collector in order to initiate the next collection.

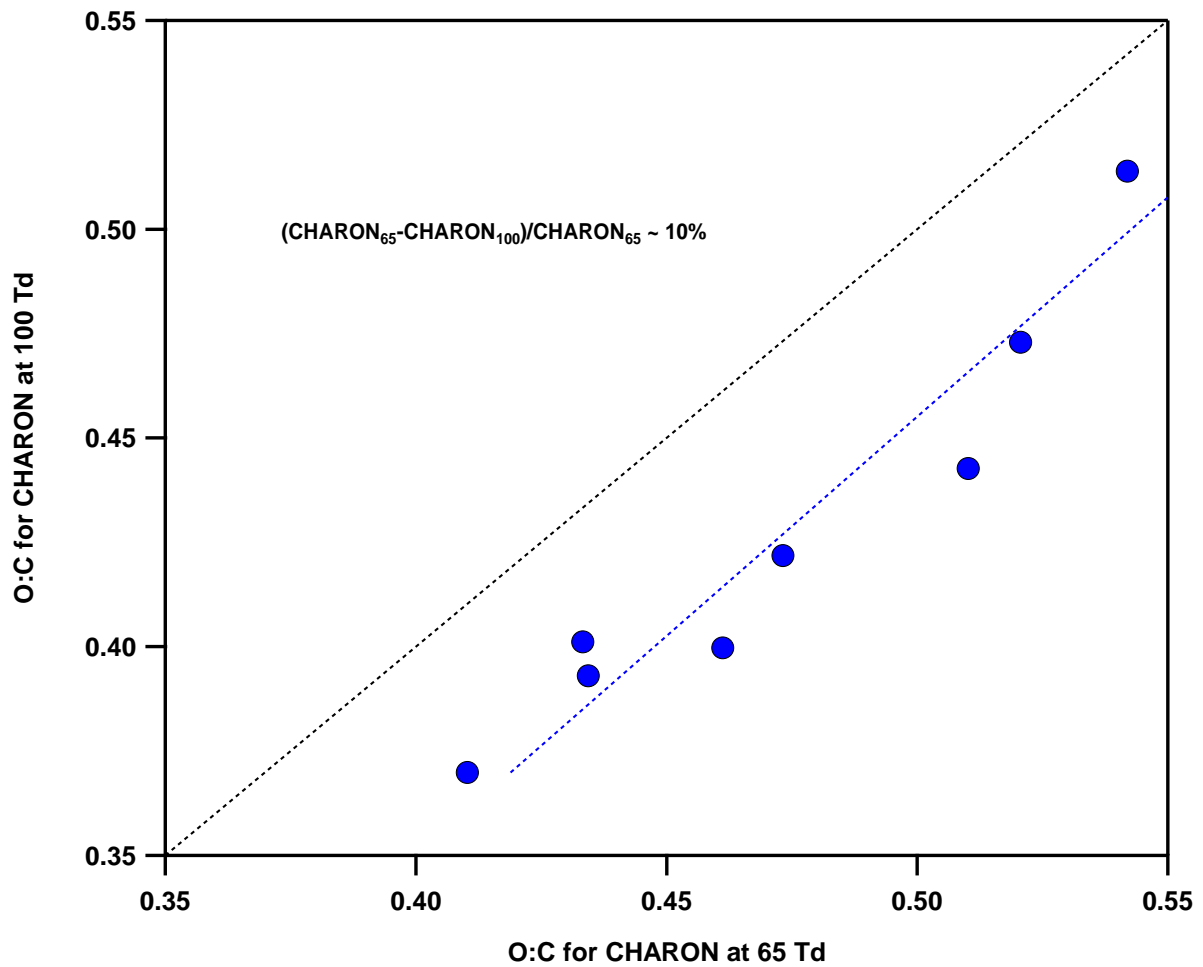

Figure S 2: Comparison of the tree emissions oxygen to carbon ratio for the different E/N conditions the CHARON was operated (x-axis for E/N 65 Td and y-axis for E/N 100 Td). The black dash line indicates the 1:1 line and the blue dash line is the linear fit applied to the data. The upper right equation provides the average % difference between the two data sets.

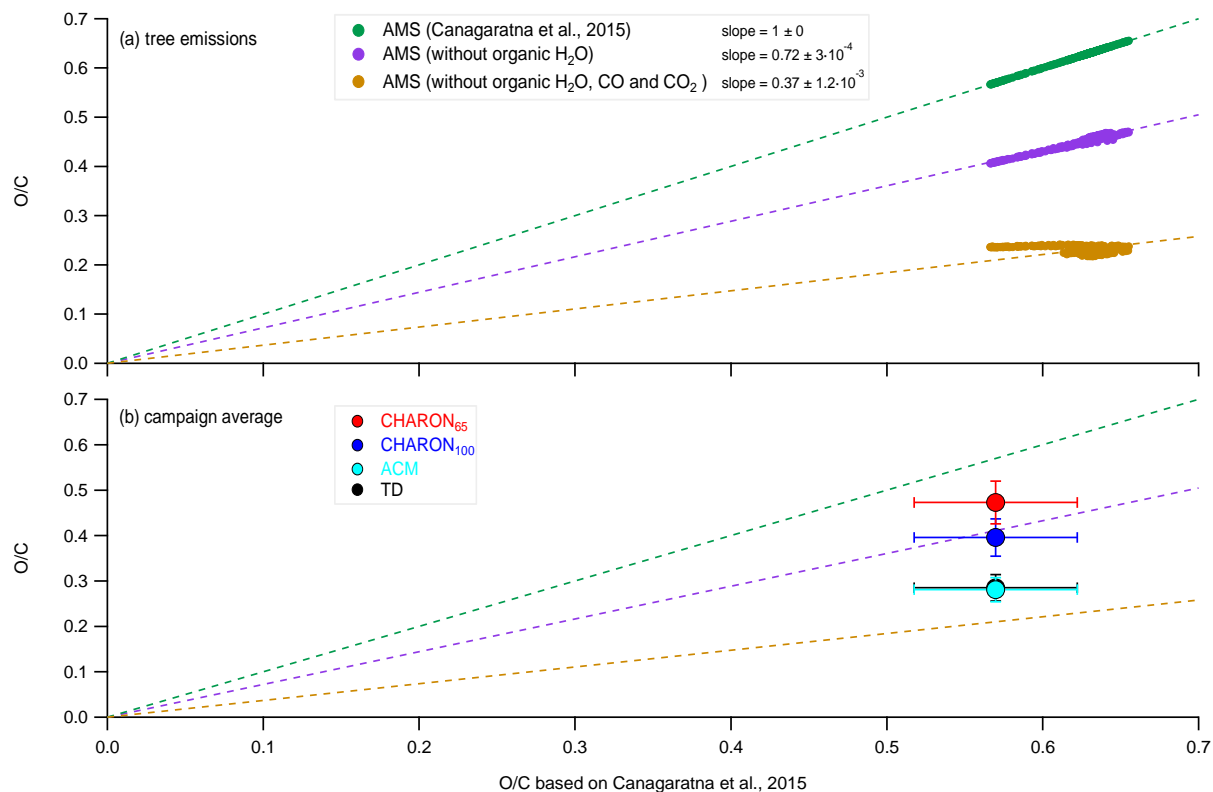

**Figure S 3: The AMS O:C based on Canagaratna et al. (2015)(x-axis) compared to (a) the AMS O:C during the tree emissions ozonolysis experiment, when excluding surface fragmentation peaks (H<sub>2</sub>O, CO and CO<sub>2</sub>) and (b) the different aerosol chemical characterization techniques average O:C throughout the campaign. CHARON<sub>65</sub> data are averaged only for the tree emissions experiment. Error bars indicate the  $\pm 1$  standard deviation of the average both for the AMS and the different aerosol chemical characterization techniques. Dash lines correspond to the linear fit of the AMS case studies (green: AMS based on Canagaratna et al., 2015, purple: AS without organic H<sub>2</sub>O peak and brown: AMS without organic H<sub>2</sub>O, CO and CO<sub>2</sub>).**

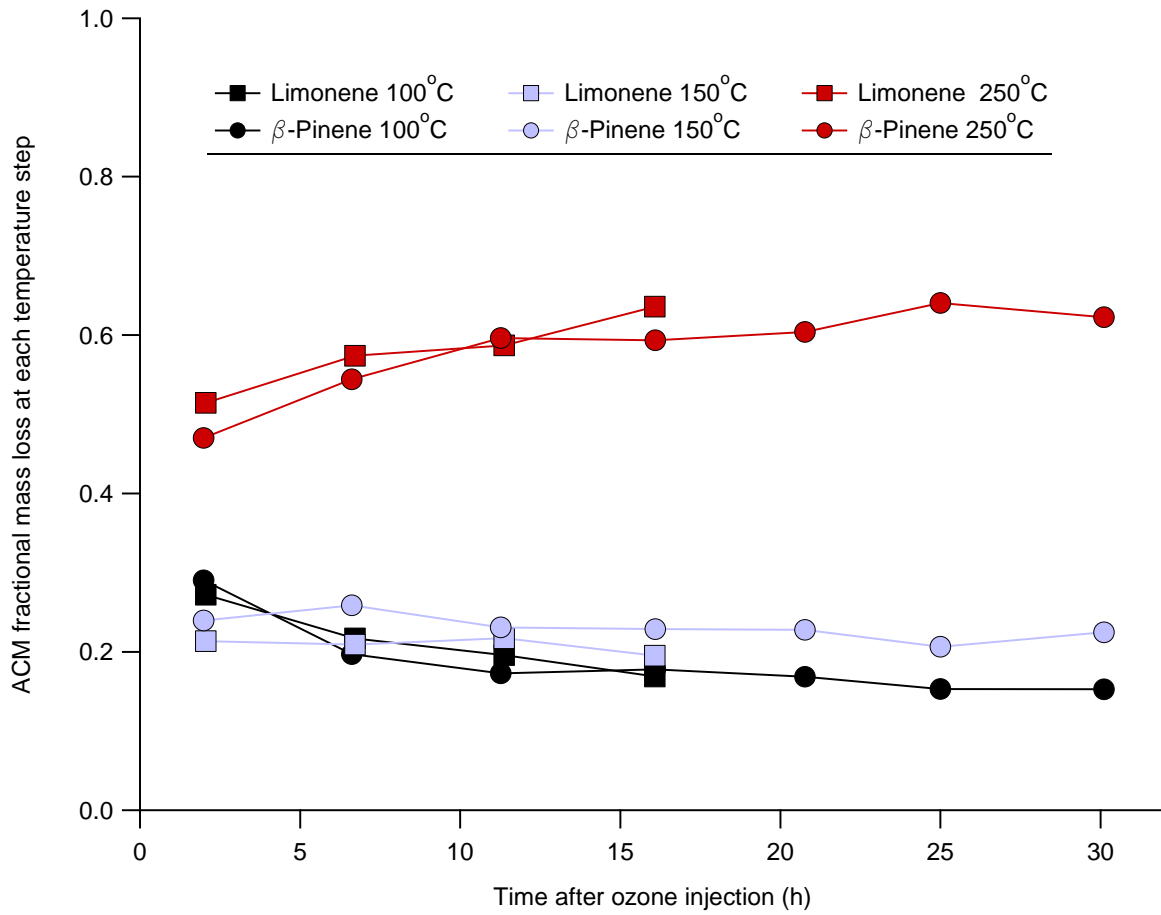

Figure S 4: Temperature contribution of the ACM during the  $\beta$ -pinene (circle markers) and limonene (square markers) experiment versus the time after ozone injection. Different colors correspond to different temperatures.



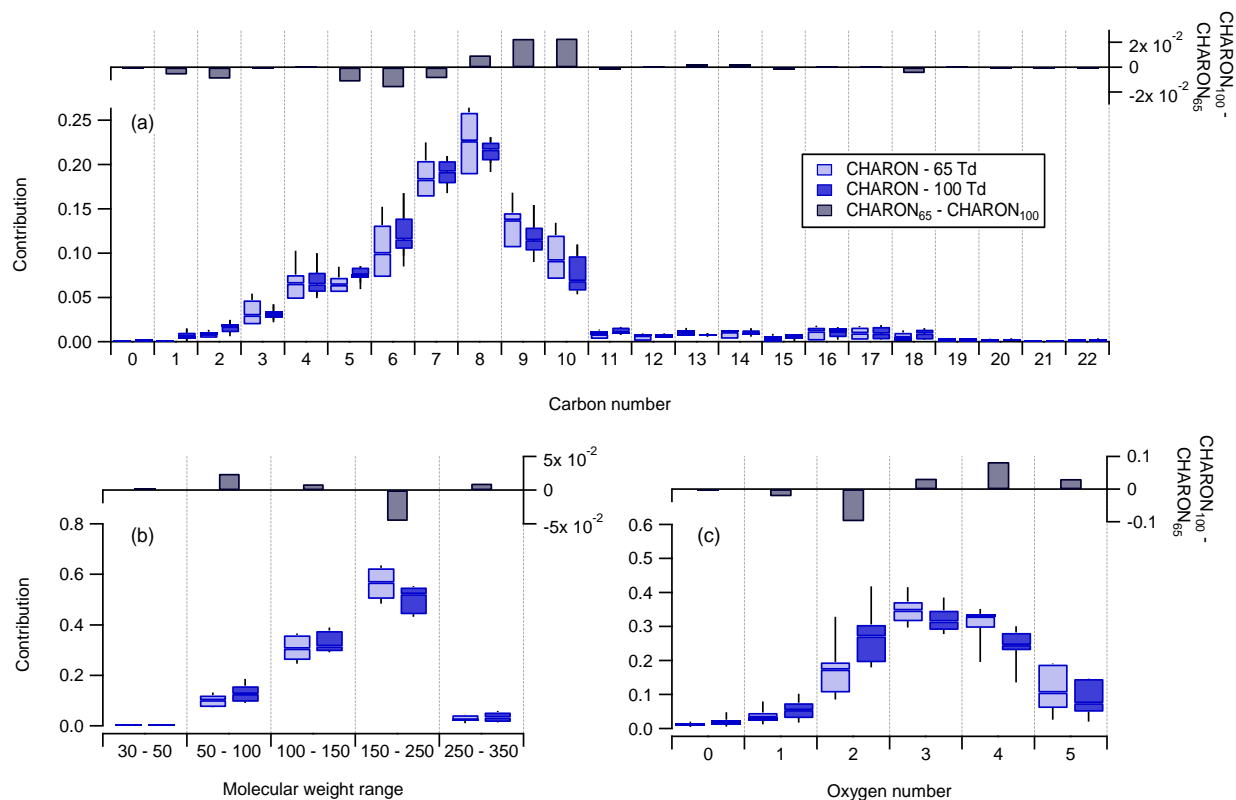

**Figure S 5: Box-and-whisker plots showing the relative OA mass concentration distribution dependent on (a) molecular carbon number, (b) molecular weight and (c) molecular oxygen number for the tree emissions experiment and CHARON operated at two different E/N conditions indicated with different colours (CHARON<sub>100</sub> dark blue, CHARON<sub>65</sub> ciel). Each box-and-whisker corresponds to the median, 25<sup>th</sup> and 75<sup>th</sup> percentile levels of all data for the tree emissions experiment. Upper graphs indicate the difference between the CHARON operated at 65 Td to the 100 Td.**

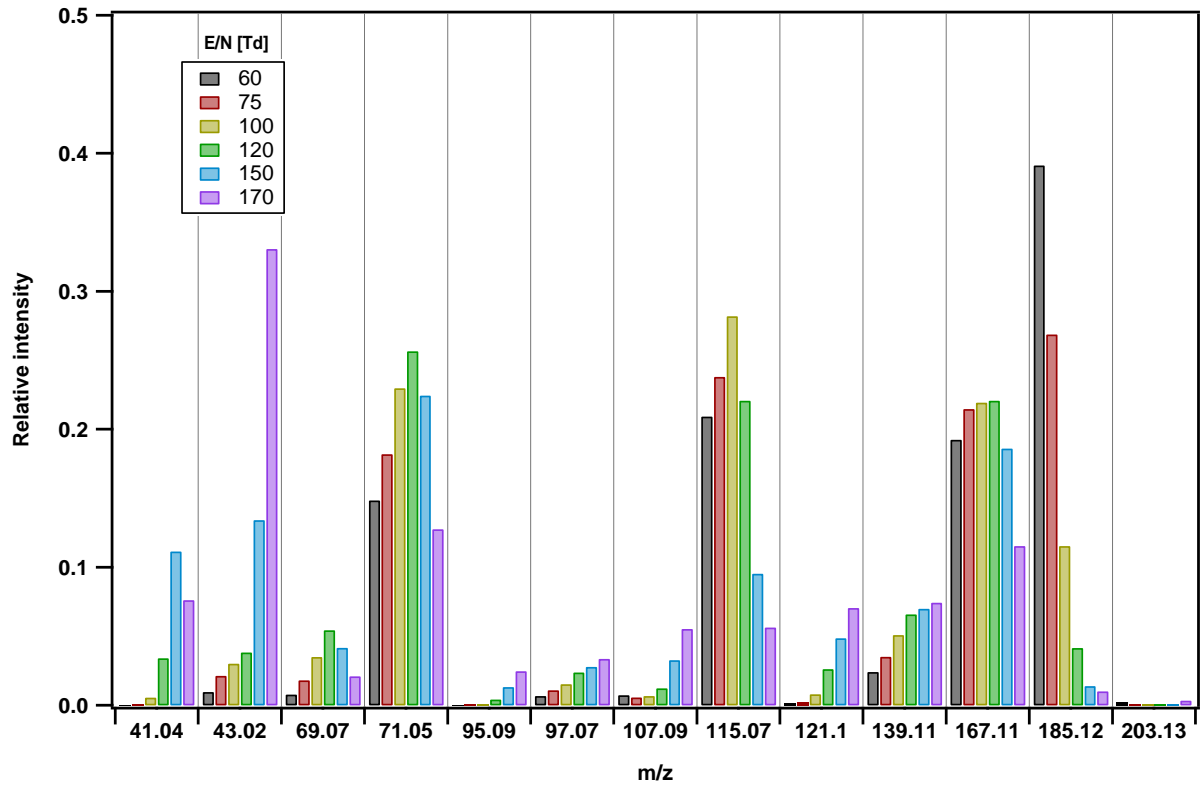

Figure S 6: Lab experiments to measure pinonic acid at different E/N conditions. Relative intensity of each  $m/z$  (transmission corrected normalized counts per second fraction) for the different E/N conditions indicated by the bar colour.

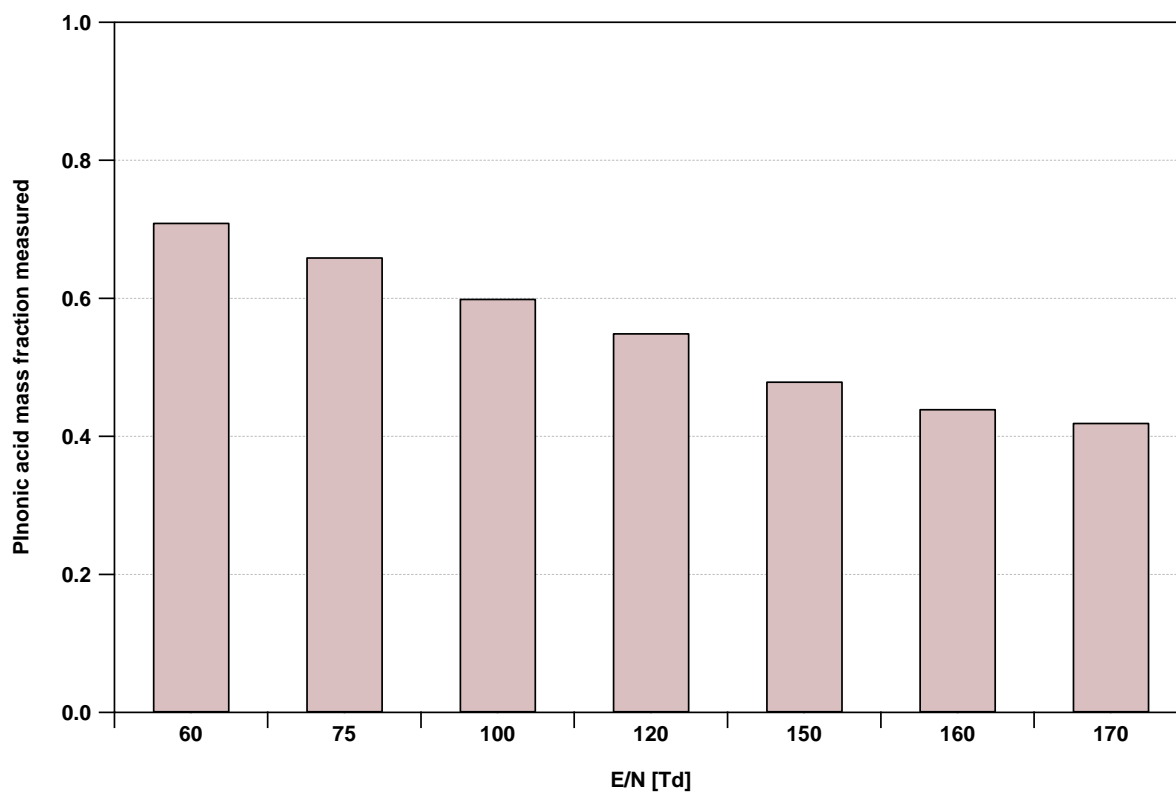

Figure S 7: Mass fraction of the pinonic acid particles compared to an SMPS, for the different E/N conditions of the CHARON-PTR-ToF-MS, ranging from 60 up to 173 Td. Assumption of uniform sensitivity is made and mass concentration is generated by taking the sum of all fragments and assuming all  $m/z$ s represent parent molecules.

## References

Canagaratna, M. R., J. L. Jimenez, J. H. Kroll, Q. Chen, S. H. Kessler, P. Massoli, L. Hildebrandt Ruiz, E. Fortner, L. R. Williams, K. R. Wilson, J. D. Surratt, N. M. Donahue, J. T. Jayne, and D. R. Worsnop: Elemental ratio measurements of organic compounds using aerosol mass spectrometry: characterization, improved

calibration, and implications, *Atmospheric Chemistry and Physics*, 15(1), 253-272, doi:10.5194/acp-15-253-2015, 2015.

Chen, J., and R. Griffin: Modeling secondary organic aerosol formation from oxidation of  $\alpha$ -pinene,  $\beta$ -pinene, and  $\gamma$ -limonene, *Atmospheric Environment*, 39(40), 7731-7744, doi:10.1016/j.atmosenv.2005.05.049, 2005.

Hohaus, T., I. Gensch, J. R. Kimmel, D. R. Worsnop, and A. Kiendler-Scharr: Experimental determination of the partitioning coefficient of  $\beta$ -pinene oxidation products in SOAs, *Physical Chemistry Chemical Physics*, 17(22), 14796-14804, doi:10.1039/C5CP01608H, 2015.

Jaoui, M., E. Corse, T. E. Kleindienst, J. H. Offenberg, M. Lewandowski, and E. O. Edney: Analysis of Secondary Organic Aerosol Compounds from the Photooxidation of d-Limonene in the Presence of NOX and their Detection in Ambient PM<sub>2.5</sub>, *Environ Sci Technol*, 40(12), 3819-3828, doi:10.1021/es052566z, 2006.

Jenkin, M. E.: Modelling the formation and composition of secondary organic aerosol from  $\alpha$ - and  $\beta$ -pinene ozonolysis using MCM v3 *Atmos. Chem. Phys.*, 4, 1741-1757, 2004.

Kundu, S., R. Fisseha, A. L. Putman, T. A. Rahn, and L. R. Mazzoleni: High molecular weight SOA formation during limonene ozonolysis: insights from ultrahigh-resolution FT-ICR mass spectrometry characterization, *Atmospheric Chemistry and Physics*, 12(12), 5523-5536, doi:10.5194/acp-12-5523-2012, 2012.

Leungsakul, S., M. Jaoui, and R. M. Kamens: Kinetic Mechanism for Predicting Secondary Organic Aerosol Formation from the Reaction of d-Limonene with Ozone, *Environ Sci Technol*, 39(24), 9583-9594, doi:10.1021/es0492687, 2005a.

Leungsakul, S., H. E. Jeffries, and R. M. Kamens: A kinetic mechanism for predicting secondary aerosol formation from the reactions of d-limonene in the presence of oxides of nitrogen and natural sunlight, *Atmospheric Environment*, 39(37), 7063-7082, doi:10.1016/j.atmosenv.2005.08.024, 2005b.

Yu, J., D. R. Cocker, R. J. Griffin, R. C. Flagan, and J. H. Seinfeld: Gas-Phase Ozone Oxidation of Monoterpenes: Gaseous and Particulate Products, *Journal of Atmospheric Chemistry*, 34(2), 207-258, doi:10.1023/a:1006254930583, 1999.
